# Supplementary material for: Early Changes in Tumor-Naive Cell-Free Methylomes and Fragmentomes Predict Outcomes in Pembrolizumab-Treated Solid Tumors
Source: PubMed Central journal article supplement — Cancer Discov. 2024 Feb 22;14(6):1048–63. doi: 10.1158/2159-8290.CD-23-1060 (PMC11145176; doi:10.1158/2159-8290.cd-23-1060), 2024-02-22
Supplement: cd-23-1060_supplementary_figure_1_suppsf1.pdf [file cd-23-1060_supplementary_figure_1_suppsf1.pdf]

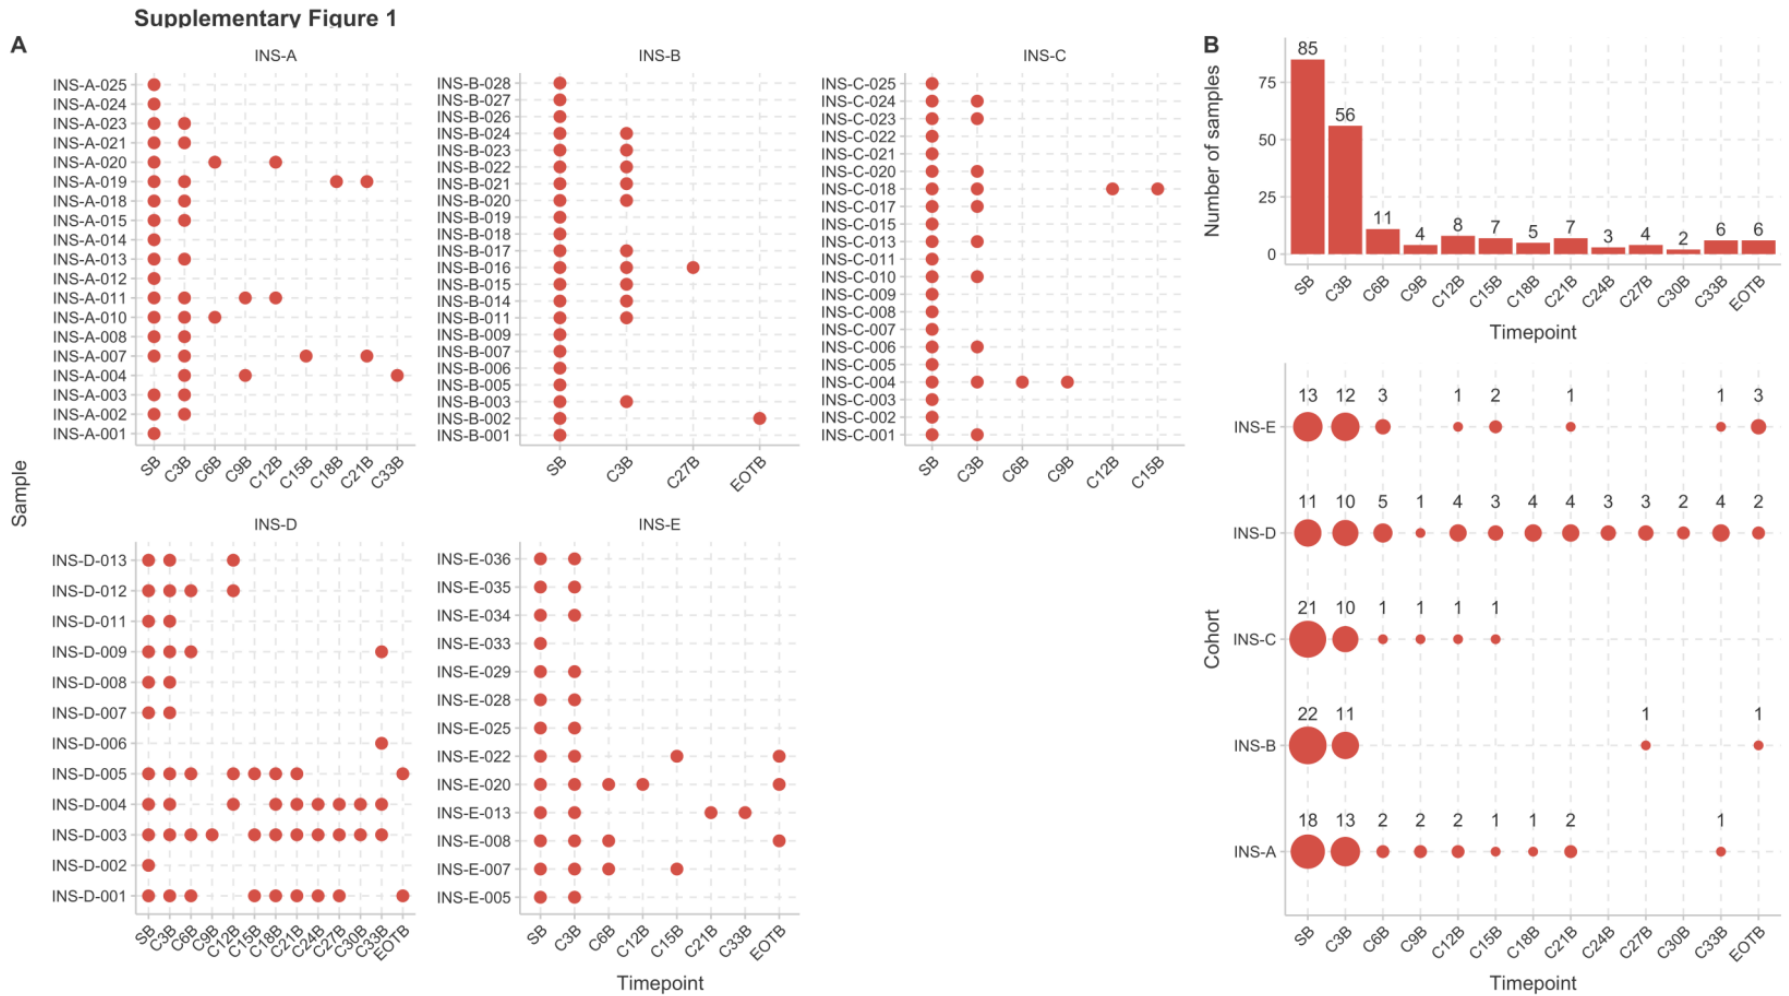

**Supplementary Figure 1.** Overview of the timepoints included in cfMeDIP-seq analysis for each patient. (A) Every sample included by patient and timepoint. (B) Numbers of samples analyzed per cohort and timepoint.
