# Supplementary material for: Early Changes in Tumor-Naive Cell-Free Methylomes and Fragmentomes Predict Outcomes in Pembrolizumab-Treated Solid Tumors
Source: PubMed Central journal article supplement — Cancer Discov. 2024 Feb 22;14(6):1048–63. doi: 10.1158/2159-8290.CD-23-1060 (PMC11145176; doi:10.1158/2159-8290.cd-23-1060), 2024-02-22
Supplement: cd-23-1060_supplementary_figure_2_suppsf2.pdf [file cd-23-1060_supplementary_figure_2_suppsf2.pdf]

Supplementary Figure 2

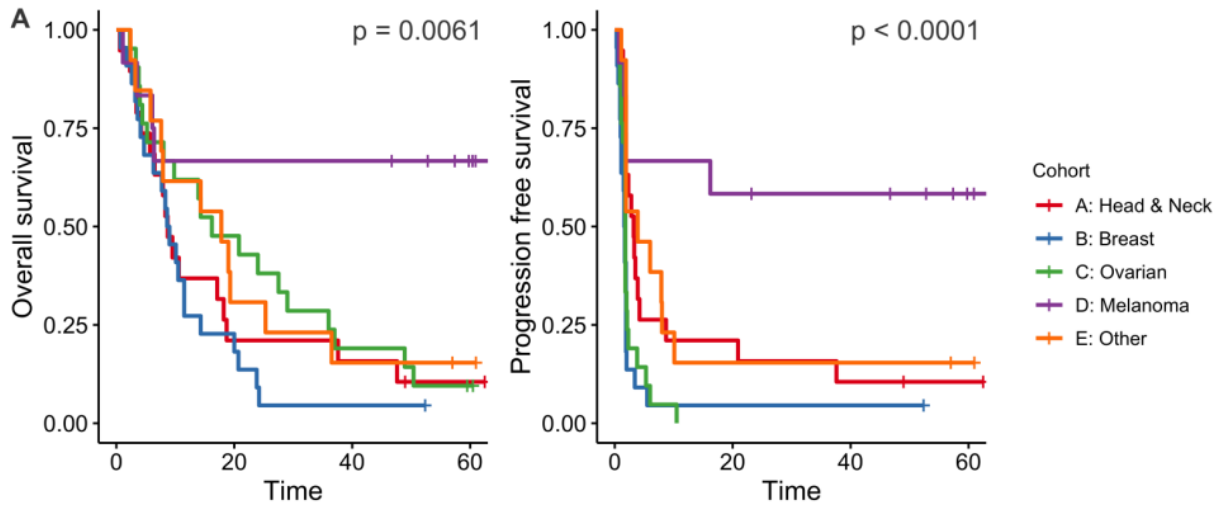

B OS by cohort

| Variable | N        | Hazard ratio      | p     |
|----------|----------|-------------------|-------|
| cohort   | INS-A 19 | Reference         |       |
|          | INS-B 22 | 1.31 (0.69, 2.49) | 0.416 |
|          | INS-C 21 | 0.76 (0.39, 1.46) | 0.405 |
|          | INS-D 12 | 0.20 (0.07, 0.60) | 0.004 |
|          | INS-E 13 | 0.76 (0.36, 1.63) | 0.484 |

PFS by cohort

| Variable | N        | Hazard ratio      | p     |
|----------|----------|-------------------|-------|
| cohort   | INS-A 19 | Reference         |       |
|          | INS-B 22 | 2.46 (1.28, 4.70) | 0.007 |
|          | INS-C 21 | 2.11 (1.10, 4.05) | 0.024 |
|          | INS-D 12 | 0.31 (0.11, 0.85) | 0.023 |
|          | INS-E 13 | 0.86 (0.40, 1.84) | 0.697 |

**Supplementary Figure 2. Overall survival (OS) and progression free survival (PFS) in included patients by cohort.** (A) Kaplan-meier curves are shown indicating the OS and PFS of patients in five histology-specific cohorts. (B) Forest plot of the hazard ratios for each cohort in a Cox proportional hazards model, with Cohort A as the reference level.
