# Supplementary material for: Early Changes in Tumor-Naive Cell-Free Methylomes and Fragmentomes Predict Outcomes in Pembrolizumab-Treated Solid Tumors
Source: PubMed Central journal article supplement — Cancer Discov. 2024 Feb 22;14(6):1048–63. doi: 10.1158/2159-8290.CD-23-1060 (PMC11145176; doi:10.1158/2159-8290.cd-23-1060), 2024-02-22
Supplement: cd-23-1060_supplementary_figure_3_suppsf3.pdf [file cd-23-1060_supplementary_figure_3_suppsf3.pdf]

### Supplementary Figure 3

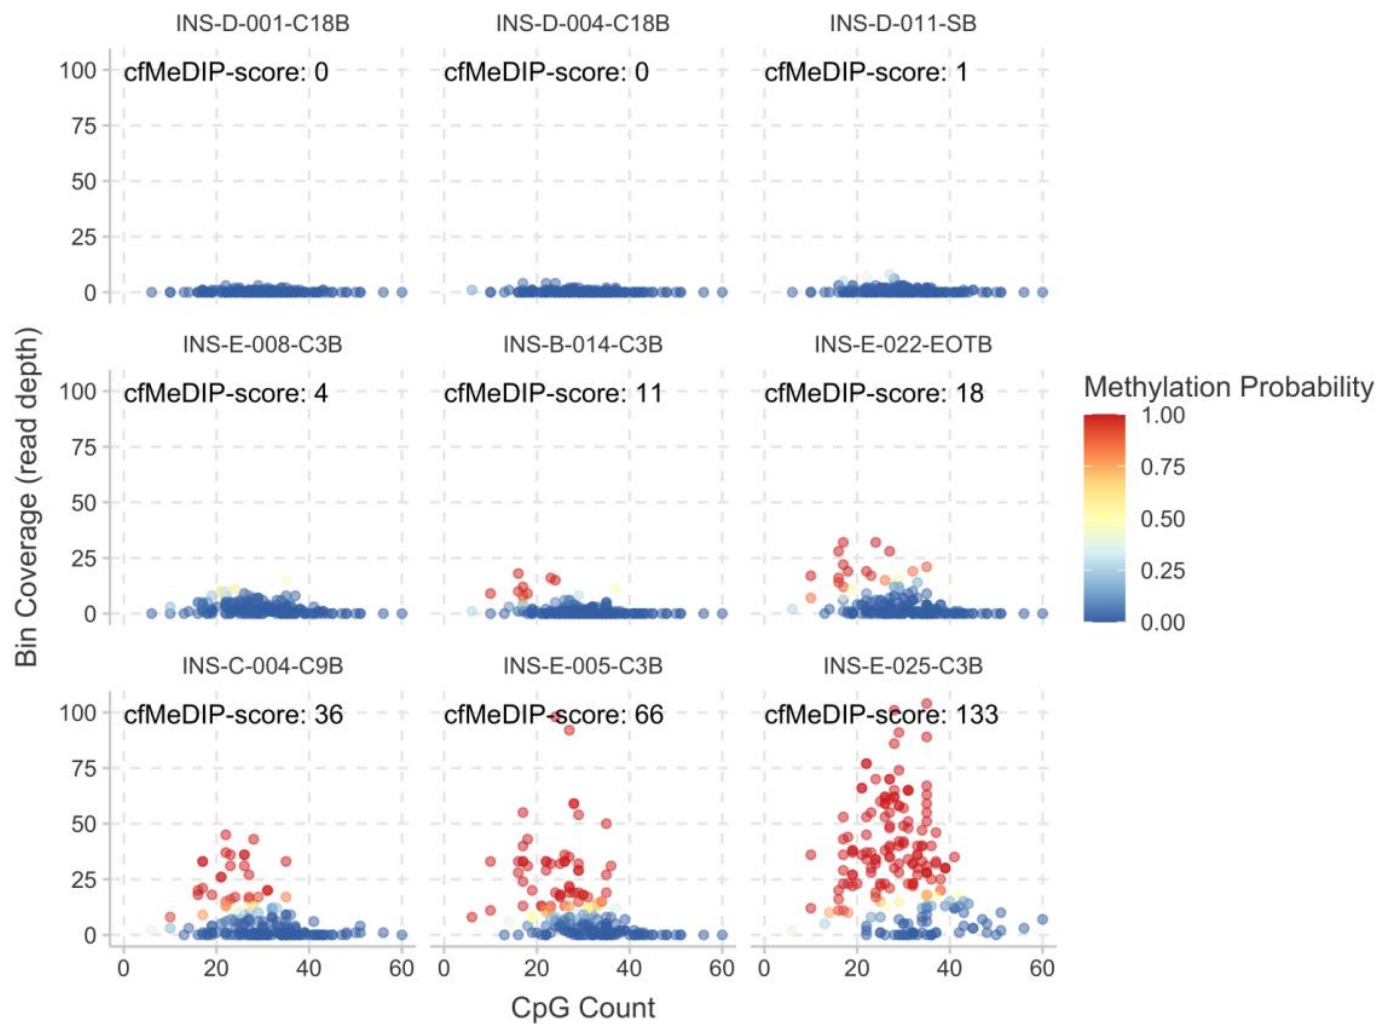

**Supplementary Figure 3. Examples of cancer-specific methylation score calculation.** Cancer-specific methylation scores were computed using the sum of inferred absolute methylation values for all reads overlapping an independently-trained cancer-specific signature. Here, we show examples illustrating how absolute methylation levels are inferred from coverage depths in 300 bp bins while adjusting for the density of CpGs.
