# Supplementary material for: Early Changes in Tumor-Naive Cell-Free Methylomes and Fragmentomes Predict Outcomes in Pembrolizumab-Treated Solid Tumors
Source: PubMed Central journal article supplement — Cancer Discov. 2024 Feb 22;14(6):1048–63. doi: 10.1158/2159-8290.CD-23-1060 (PMC11145176; doi:10.1158/2159-8290.cd-23-1060), 2024-02-22
Supplement: cd-23-1060_supplementary_figure_6_suppsf6.pdf [file cd-23-1060_supplementary_figure_6_suppsf6.pdf]

Supplementary Figure 6

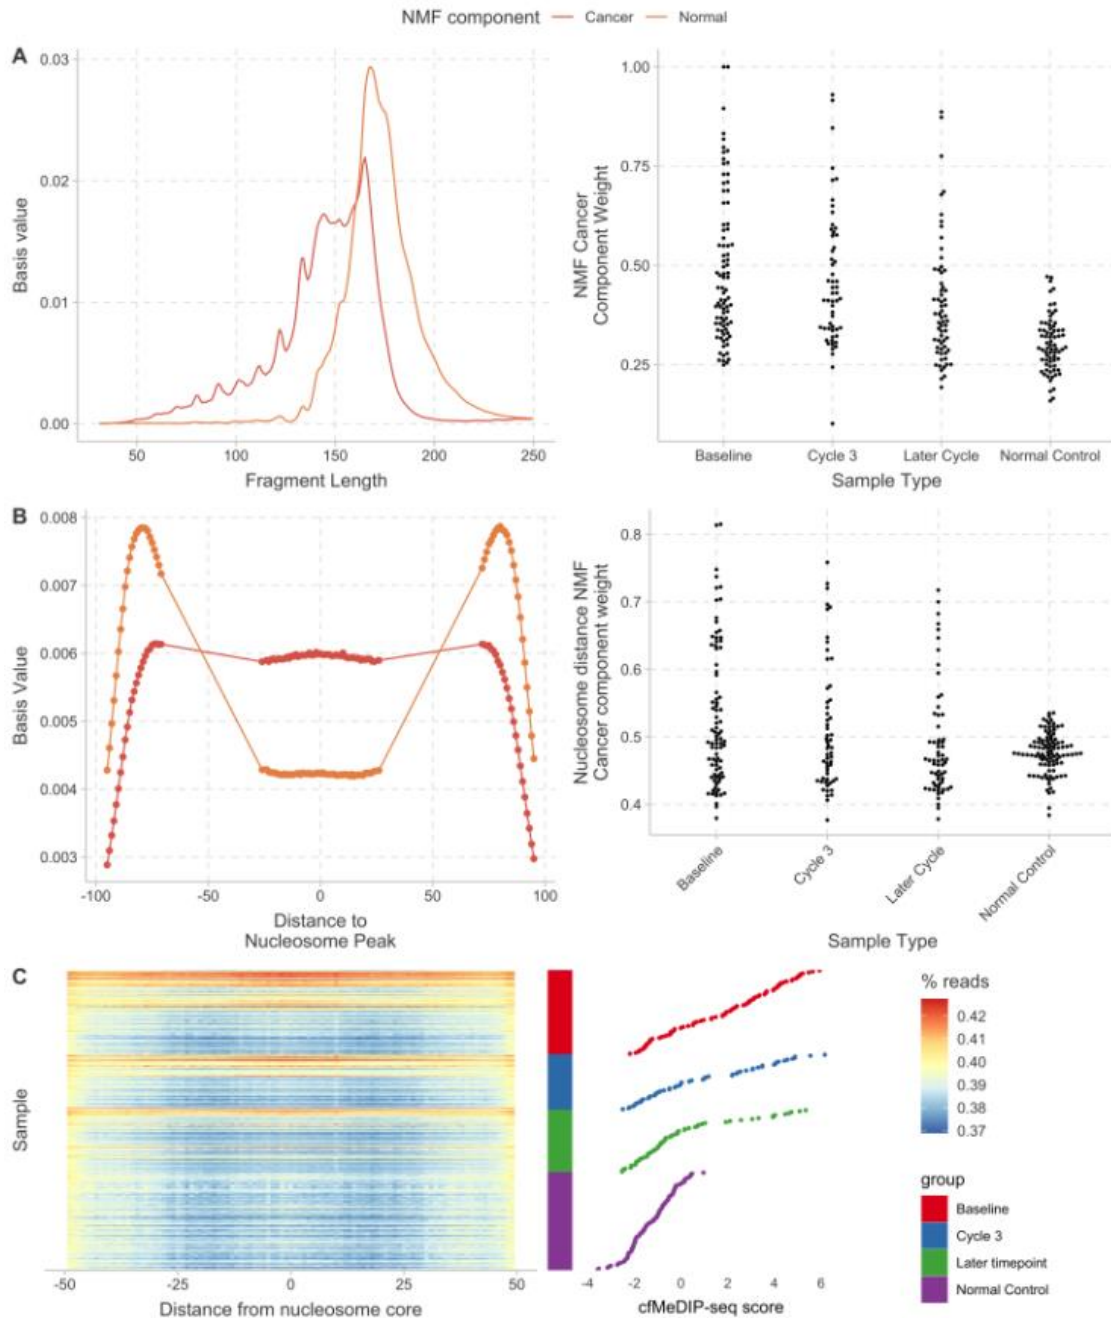

**Supplementary Figure 6. Non-negative matrix factorization identifies characteristic cancer-associated signatures of shorter fragment lengths and greater nucleosome core occupancy.** (A) Genome-wide fragment lengths were used as features in a two-component non-negative matrix factorization analysis. This revealed a longer and a shorter component. The weight of the shorter was elevated in cell-free DNA of cancer patients relative to normal controls. (B) The distances of fragment ends to

nucleosome centers were also used as features in two-component non-negative matrix factorization. This revealed two components with different proportions of intra-nucleosomal fragment ends. The signature with more intra-nucleosomal fragment ends was elevated in the cell-free DNA of cancer patients relative to normal controls. (C) A heatmap showing the localization of fragment ends within the nucleosome core, meaning within 50 bp of nucleosome peaks. Arranging by group and total cfMeDIP-seq score, we observe that those with higher estimated ctDNA levels demonstrated a higher fraction of read ends terminating within the nucleosome core.
