# Supplementary material for: Early Changes in Tumor-Naive Cell-Free Methylomes and Fragmentomes Predict Outcomes in Pembrolizumab-Treated Solid Tumors
Source: PubMed Central journal article supplement — Cancer Discov. 2024 Feb 22;14(6):1048–63. doi: 10.1158/2159-8290.CD-23-1060 (PMC11145176; doi:10.1158/2159-8290.cd-23-1060), 2024-02-22
Supplement: cd-23-1060_supplementary_figure_7_suppsf7.pdf [file cd-23-1060_supplementary_figure_7_suppsf7.pdf]

### Supplementary Figure 7

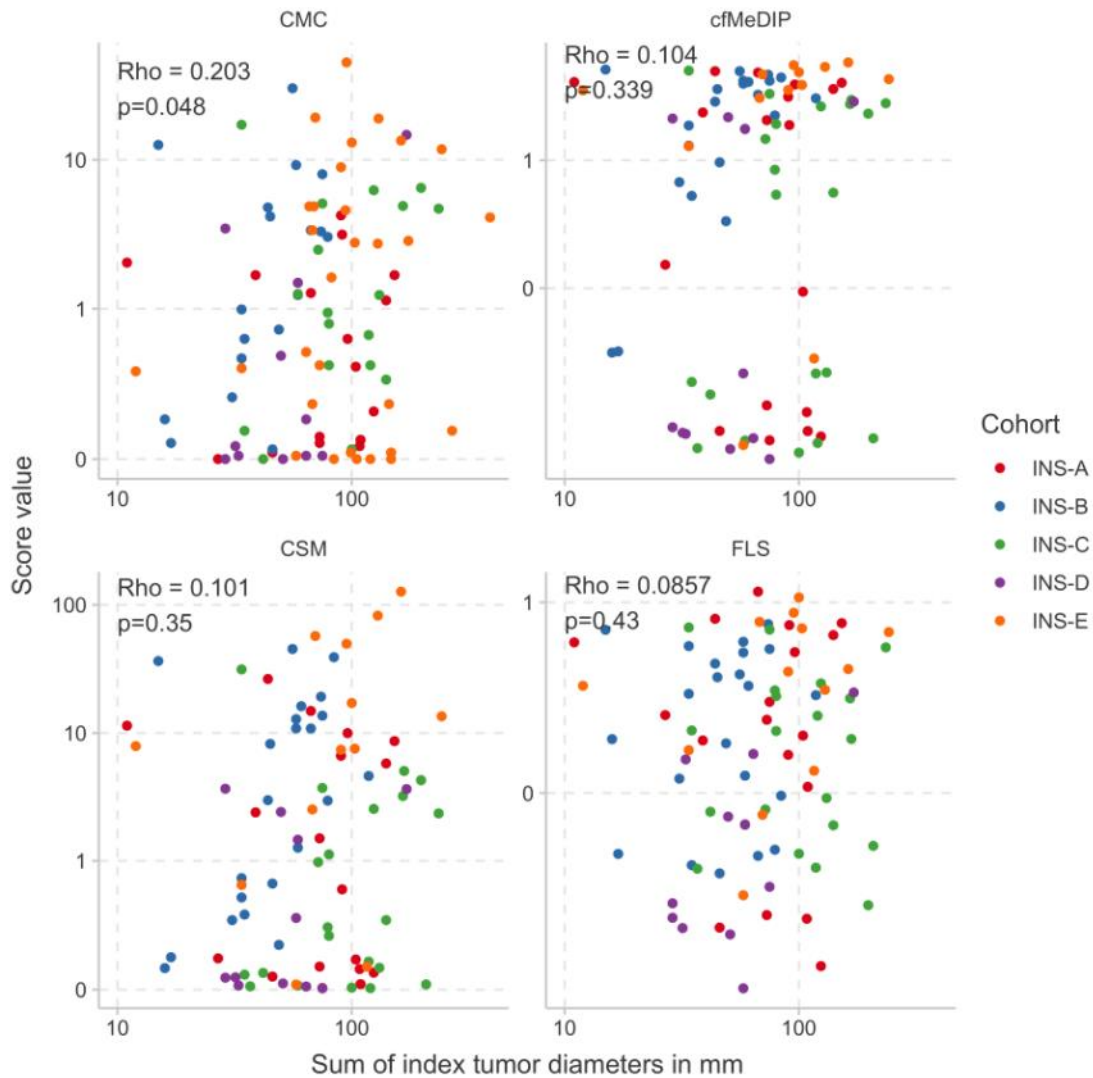

**Supplementary Figure 7. Association of tumor burden with cancer mutation concentration (CMC), as well as cancer-specific methylation (CSM) and fragment length score (FLS).** We computed CMC from personalized tumor-informed mutation arrays. We also computed CSM and FLS from methylation and fragmentomic analysis respectively of data from cell-free methylated DNA immunoprecipitation and sequencing (cfMeDIP-seq) assays. Coefficients and p-values were computed using Spearman correlations.
