# Supplementary material for: Early Changes in Tumor-Naive Cell-Free Methylomes and Fragmentomes Predict Outcomes in Pembrolizumab-Treated Solid Tumors
Source: PubMed Central journal article supplement — Cancer Discov. 2024 Feb 22;14(6):1048–63. doi: 10.1158/2159-8290.CD-23-1060 (PMC11145176; doi:10.1158/2159-8290.cd-23-1060), 2024-02-22
Supplement: cd-23-1060_supplementary_figure_9_suppsf9.pdf [file cd-23-1060_supplementary_figure_9_suppsf9.pdf]

Supplementary Figure 9

Baseline - OS

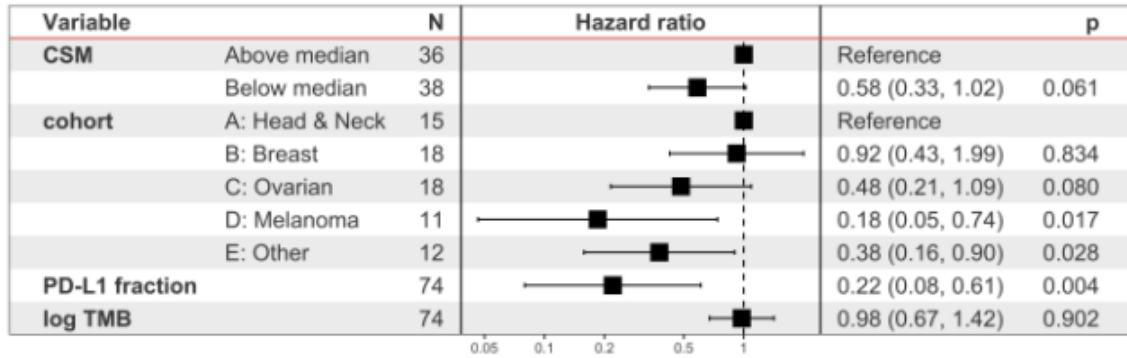

Baseline - PFS

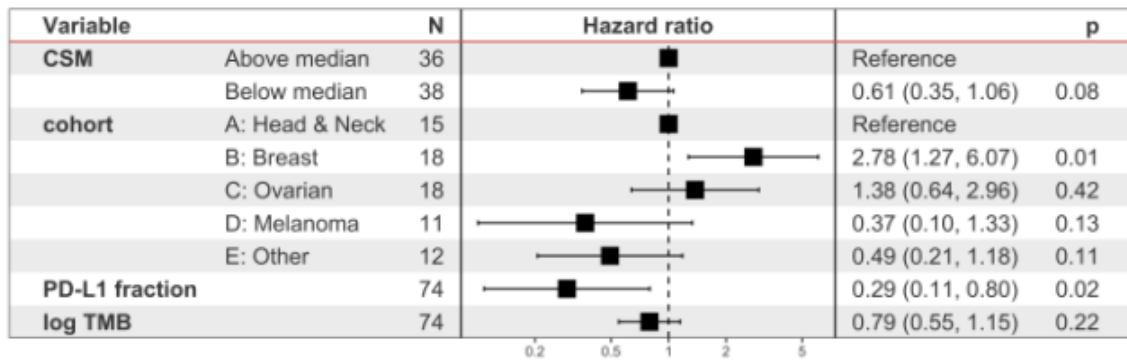

Cycle 3 - OS

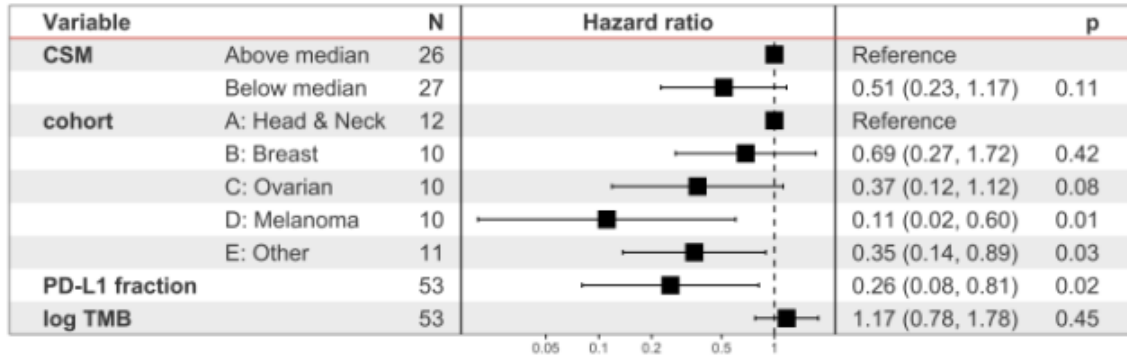

Cycle 3 - PFS

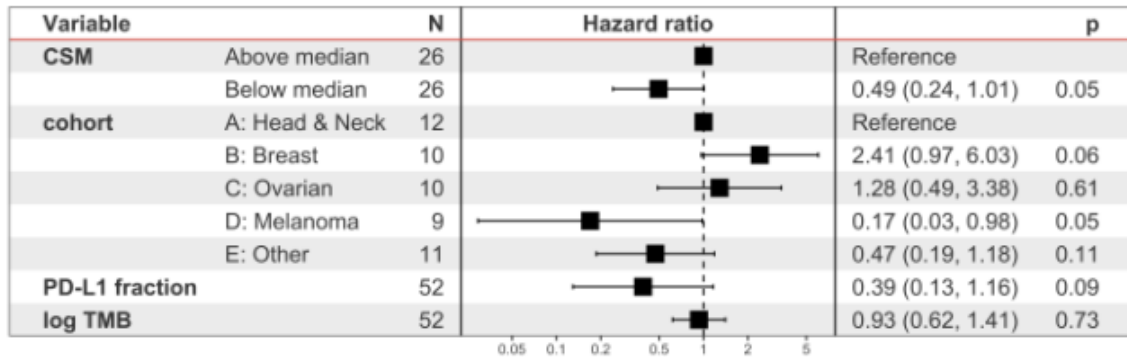

**Supplementary Figure 9. Multivariable analysis of survival using cancer-specific methylation (CSM) scores at baseline and cycle 3 of pembrolizumab.** We computed CSM scores across the trial cohort. At both baseline and cycle 3, patients were split into above- or below-median groups. Survival outcomes are shown in a multivariable analysis including cohort, PD-L1 expression, and tumor mutation burden (TMB).
