# Supplementary material for: Early Changes in Tumor-Naive Cell-Free Methylomes and Fragmentomes Predict Outcomes in Pembrolizumab-Treated Solid Tumors
Source: PubMed Central journal article supplement — Cancer Discov. 2024 Feb 22;14(6):1048–63. doi: 10.1158/2159-8290.CD-23-1060 (PMC11145176; doi:10.1158/2159-8290.cd-23-1060), 2024-02-22
Supplement: cd-23-1060_supplementary_figure_12_suppsf12.pdf [file cd-23-1060_supplementary_figure_12_suppsf12.pdf]

Supplementary Figure 12

CMC - PFS

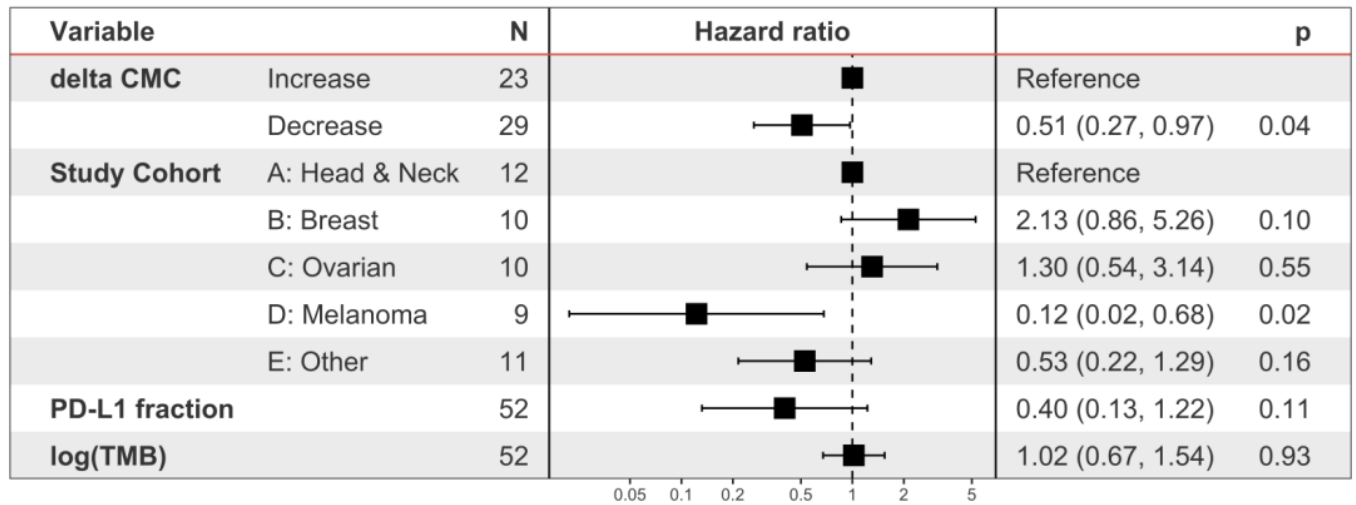

CMC - OS

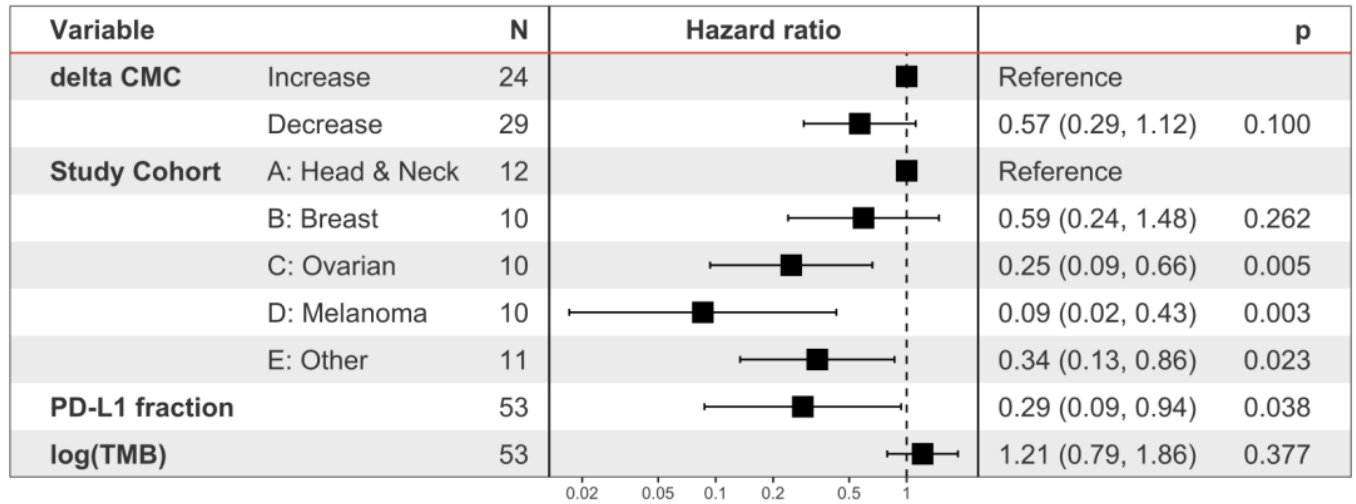

**Supplementary Figure 12. Multivariate Cox analysis of change in cancer mutation concentration (CMC) from baseline to cycle 3 of pembrolizumab.** Covariates include cohort, PD-L1 expression, and tumor mutation burden.
