# Supplementary material for: Early Changes in Tumor-Naive Cell-Free Methylomes and Fragmentomes Predict Outcomes in Pembrolizumab-Treated Solid Tumors
Source: PubMed Central journal article supplement — Cancer Discov. 2024 Feb 22;14(6):1048–63. doi: 10.1158/2159-8290.CD-23-1060 (PMC11145176; doi:10.1158/2159-8290.cd-23-1060), 2024-02-22
Supplement: cd-23-1060_supplementary_figure_13_suppsf13.pdf [file cd-23-1060_supplementary_figure_13_suppsf13.pdf]

### Supplementary Figure 13

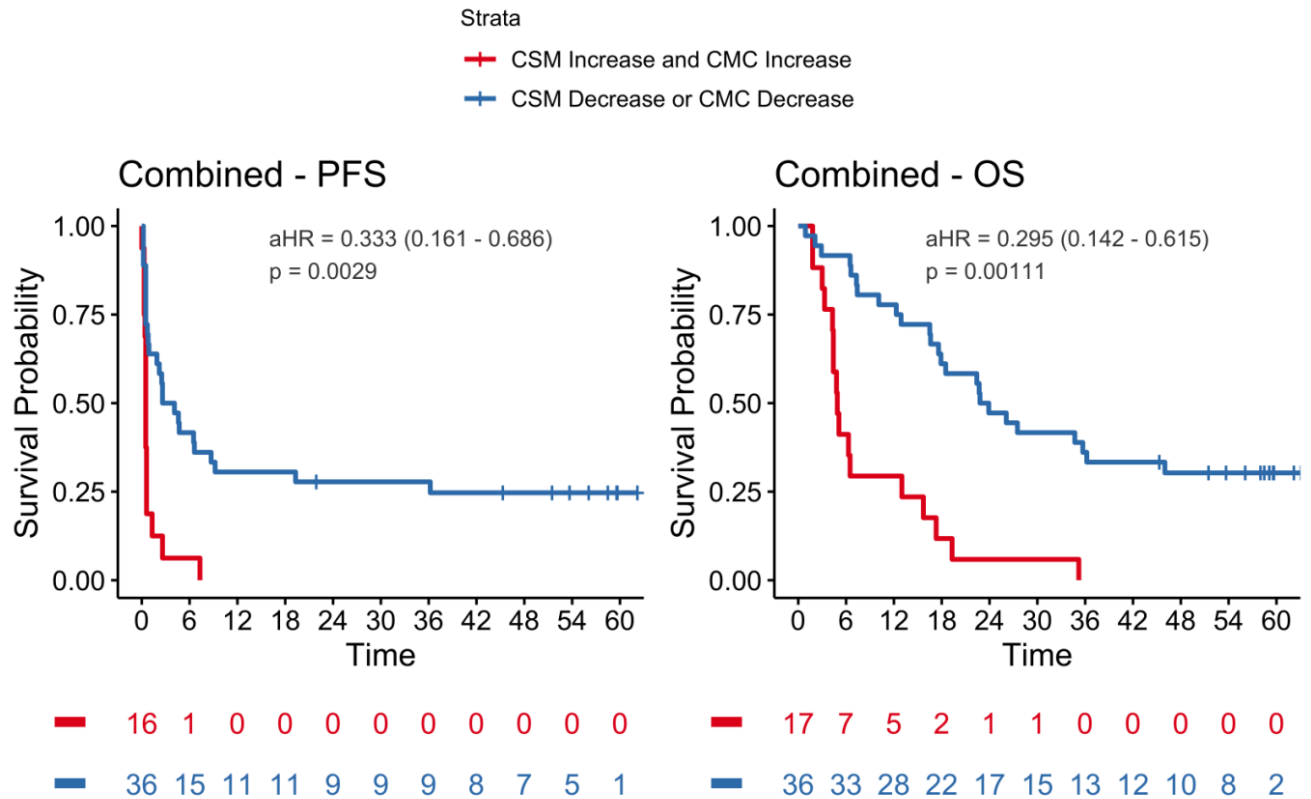

**Supplementary Figure 13. Increase in both ctDNA metrics identifies a subgroup with particularly poor outcome.** Post-hoc analysis of  $\Delta$ CSM and  $\Delta$ CMC together demonstrates that a decrease in either metric was sufficient to result in significantly improved PFS and OS, whereas increase in both metrics identified a group with particularly poor outcomes. PFS analysis at cycle 3 excludes one patient who progressed before the collection of cycle 3 sample.
