# Supplementary material for: Early Changes in Tumor-Naive Cell-Free Methylomes and Fragmentomes Predict Outcomes in Pembrolizumab-Treated Solid Tumors
Source: PubMed Central journal article supplement — Cancer Discov. 2024 Feb 22;14(6):1048–63. doi: 10.1158/2159-8290.CD-23-1060 (PMC11145176; doi:10.1158/2159-8290.cd-23-1060), 2024-02-22
Supplement: cd-23-1060_supplementary_figure_14_suppsf14.pdf [file cd-23-1060_supplementary_figure_14_suppsf14.pdf]

## Supplementary Figure 14

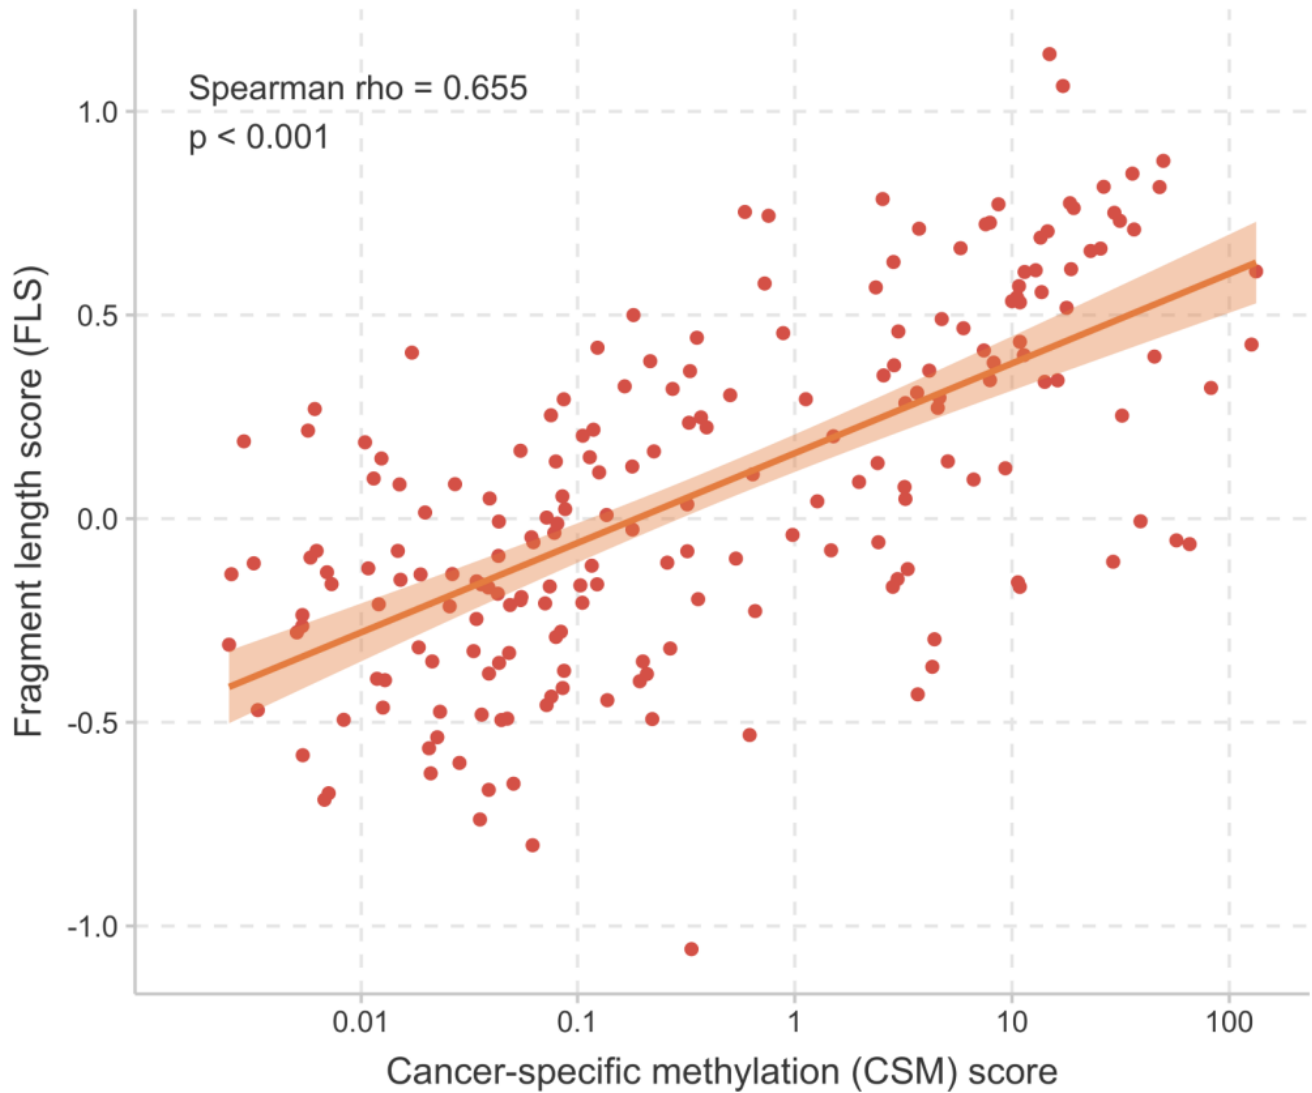

**Supplementary Figure 14. Cancer-specific methylation (CSM) and fragment length scores (FLS) are moderately correlated.** CSM and FLS scores were computed for each sample. Correlation testing between FLS and log-adjusted CSM was performed using Spearman's method.
