# Supplementary material for: Early Changes in Tumor-Naive Cell-Free Methylomes and Fragmentomes Predict Outcomes in Pembrolizumab-Treated Solid Tumors
Source: PubMed Central journal article supplement — Cancer Discov. 2024 Feb 22;14(6):1048–63. doi: 10.1158/2159-8290.CD-23-1060 (PMC11145176; doi:10.1158/2159-8290.cd-23-1060), 2024-02-22
Supplement: cd-23-1060_supplementary_figure_15_suppsf15.pdf [file cd-23-1060_supplementary_figure_15_suppsf15.pdf]

Supplementary Figure 15

Fragment length score (FLS) — Above median — Below median

FLS quartile — 1 — 2 — 3 — 4

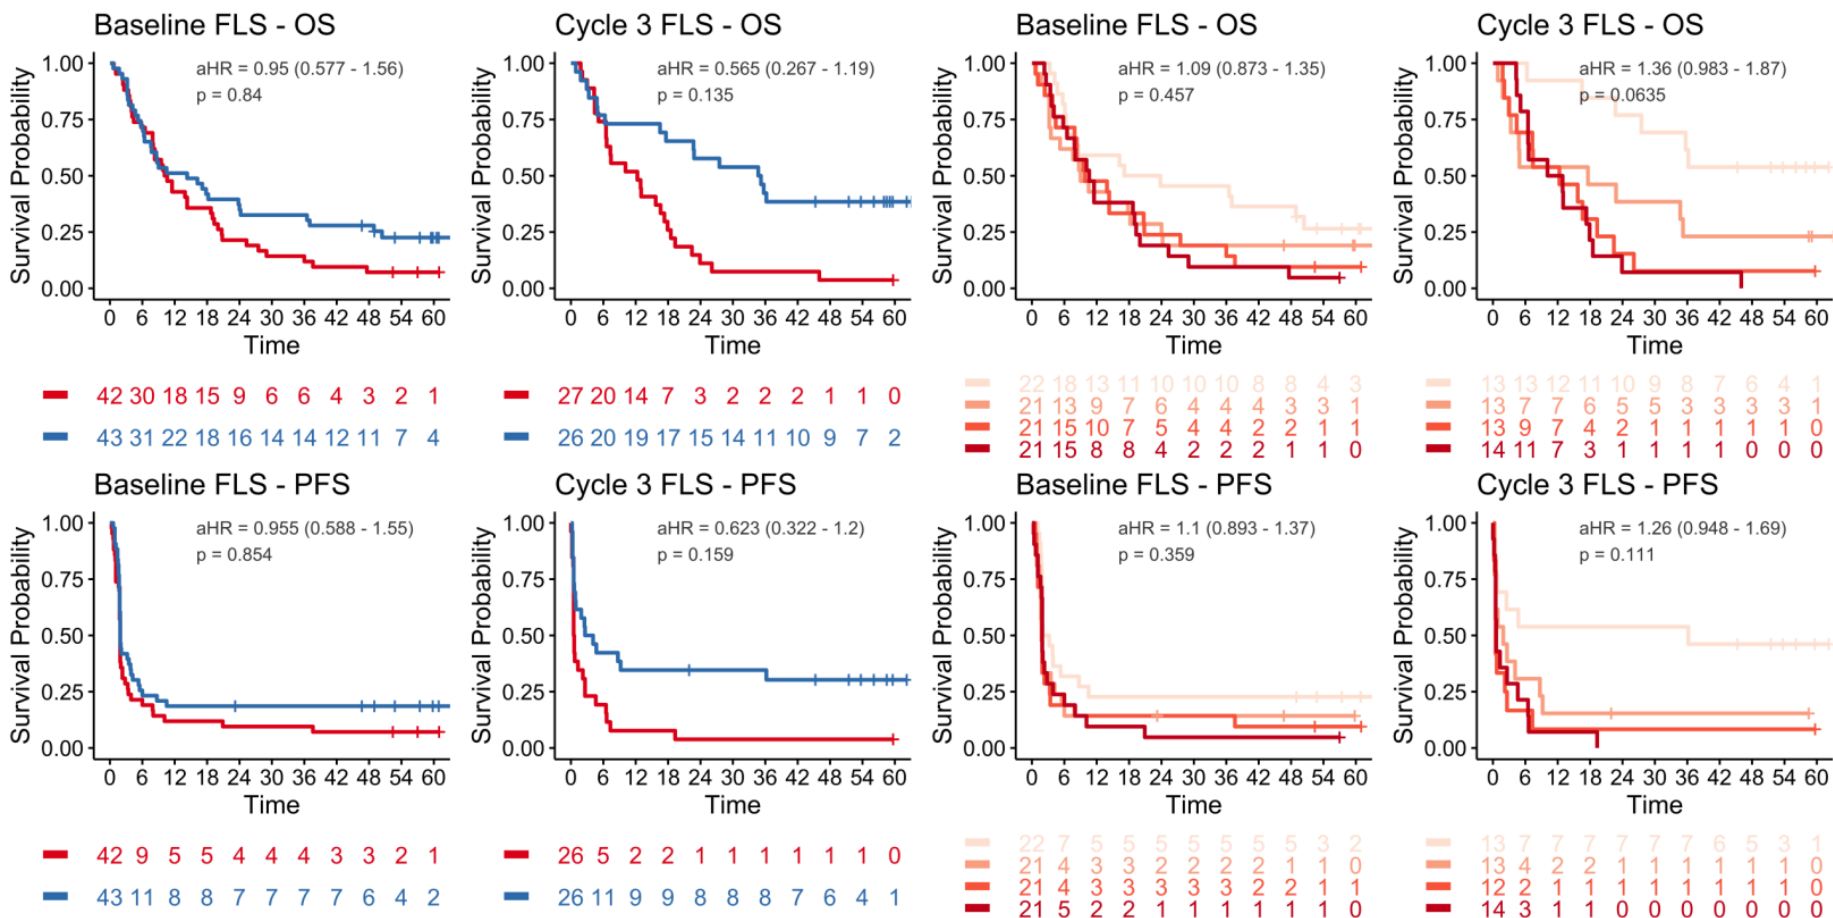

**Supplementary Figure 15. Predicting survival outcomes using fragment length score (FLS) at baseline and cycle 3 of pembrolizumab.** FLS was determined as the mean of the log2 transformed cancer-to-normal ratio of the length of each fragment in a given cfMeDIP-seq sample. At both baseline and cycle 3, patients were split into above- or below-median groups. Survival outcomes are shown, with hazard ratios and p-values adjusted for cohort using a Cox model. PFS analysis at cycle 3 excludes one patient who progressed before the collection of cycle 3 sample.
