# Supplementary material for: Early Changes in Tumor-Naive Cell-Free Methylomes and Fragmentomes Predict Outcomes in Pembrolizumab-Treated Solid Tumors
Source: PubMed Central journal article supplement — Cancer Discov. 2024 Feb 22;14(6):1048–63. doi: 10.1158/2159-8290.CD-23-1060 (PMC11145176; doi:10.1158/2159-8290.cd-23-1060), 2024-02-22
Supplement: cd-23-1060_supplementary_figure_16_suppsf16.pdf [file cd-23-1060_supplementary_figure_16_suppsf16.pdf]

### Supplementary Figure 16

Fragment Length Score (FLS) MVA - Outcome: Overall survival

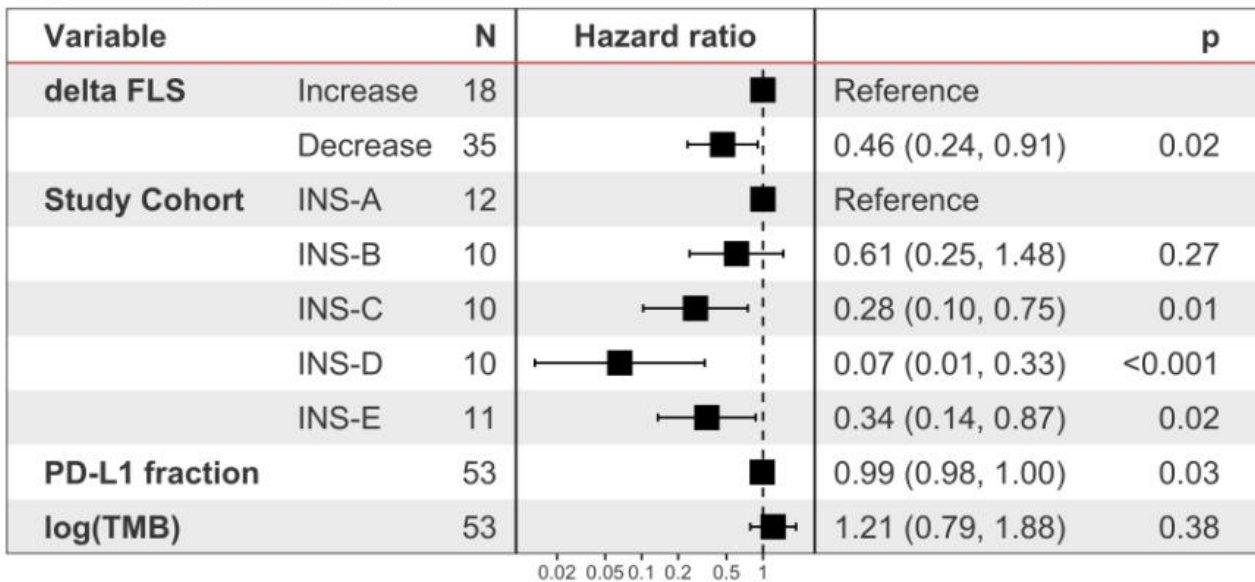

Fragment Length Score (FLS) MVA - Outcome: Progression-free survival

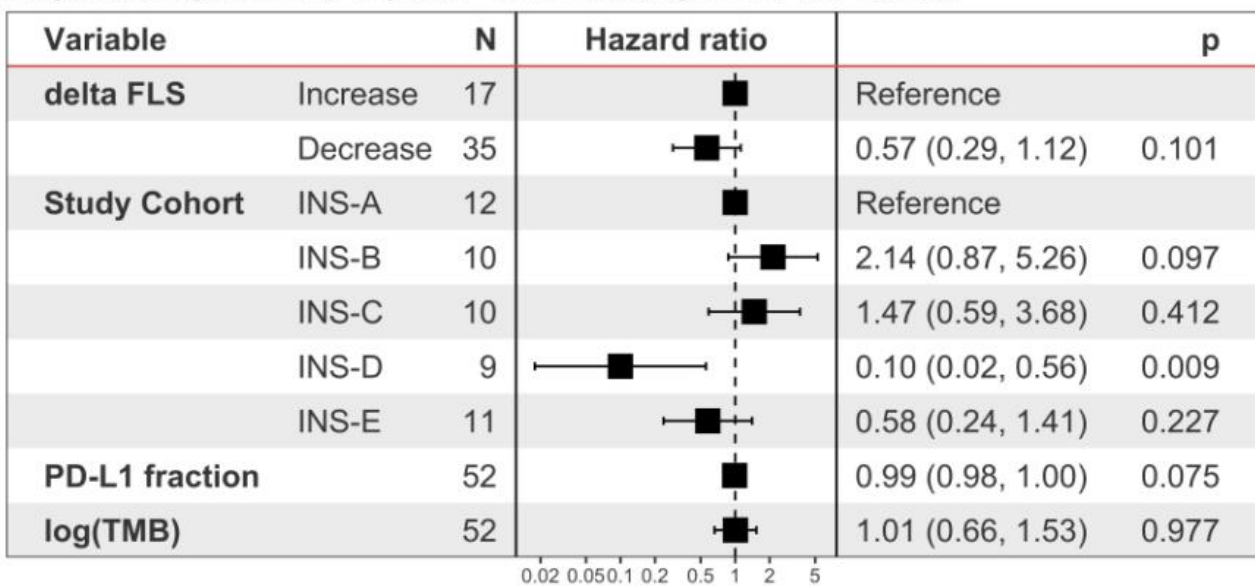

**Supplementary Figure 16. Multivariate Cox analysis of the change in fragment length score (FLS) from baseline to cycle 3 of pembrolizumab.** Covariates include cohort, PD-L1 expression, and tumor mutation burden.
